# Supplementary material for: Transcriptome Analysis Reveals the Genes Involved in Growth and Metabolism in Muscovy Ducks
Source: Hindawi journal article supplement (doi:10.1155/2021/6648435), 2021-01-01
Supplement: f3 [file 6648435.f3.pdf]

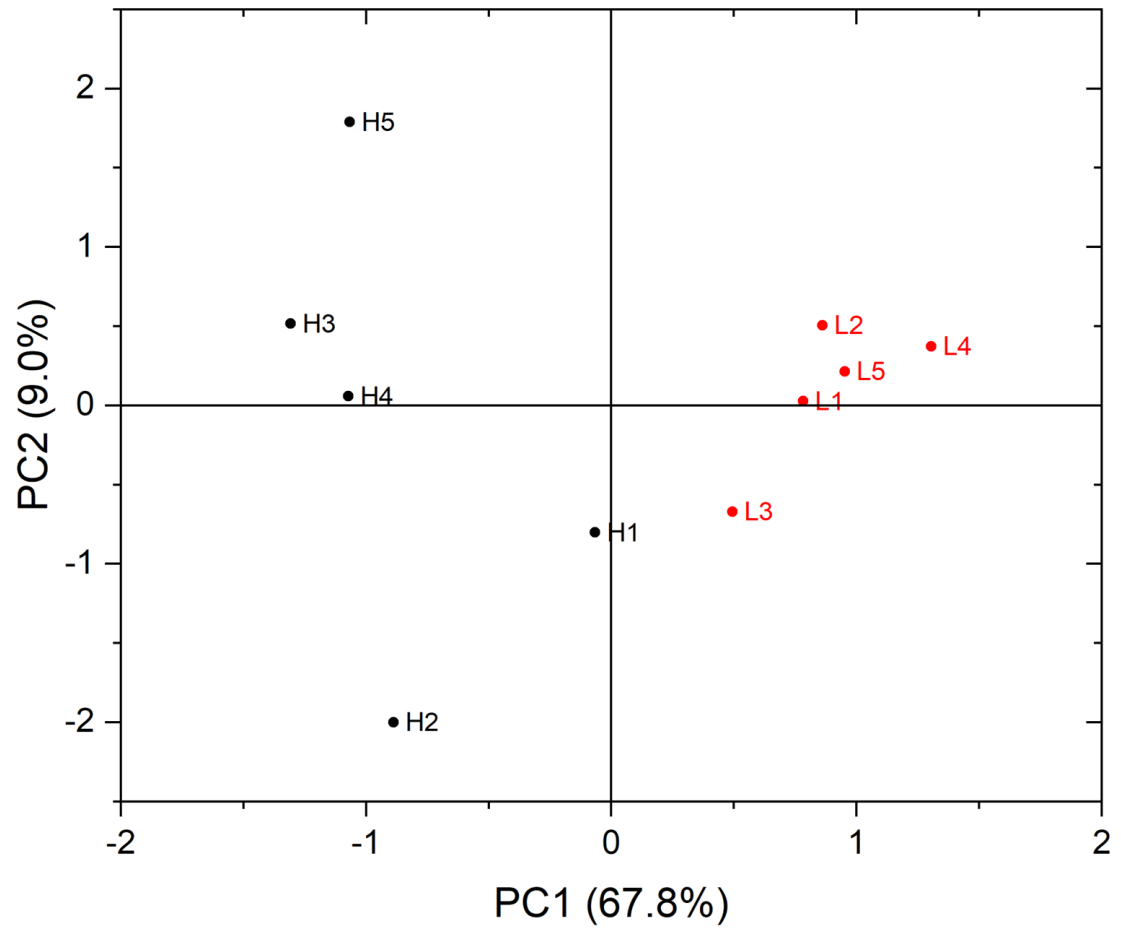

**Figure S1.** Differences between transcriptome replicates of H and L group ducks based on principal component analysis.

Note: the abscissa is the first principal component and the ordinate is the second principal component.
